# Supplementary material
Source: PubMed Central journal article supplement (PMC5302112)
Supplement: DS_10.1177_0706743716673323.pdf [file DS_10.1177_0706743716673323.pdf]

Supplementary Table 1: Sample size of ten surveys included in the analysis

| Survey                               | Respondents 15+ years | Respondents administered CIDI |
|--------------------------------------|-----------------------|-------------------------------|
| NPHS 1996 <sup>a</sup>               | 70,283                | 67,609                        |
| CCHS 1.1 <sup>a</sup>                | 122,522               | 119,395                       |
| CCHS 1.2 Mental Health <sup>a</sup>  | 36,962                | 36,768                        |
| CCHS 2.1                             | 125,452               | 45,458                        |
| CCHS 3.1                             | 124,178               | 65,217                        |
| CCHS 2007/2008                       | 123,316               | 43,006                        |
| CCHS 2009/2010                       | 116,517               | 54,020                        |
| CCHS 2011/2012                       | 117,610               | 20,133                        |
| CCHS 2012 Mental Health <sup>a</sup> | 25,113                | 24,954                        |
| CCHS 2013                            | 60,307                | 19,179                        |
| Total                                | 922,260               | 495,739                       |

<sup>a</sup> Assessment of MDE was core content in these surveys. The CIDI-SFMD was used in the first 2 surveys and the WMH-CIDI was used in the 2002 and 2012 mental health surveys.

Supplementary Table 2. Provinces selecting the MDE module

|                       | NPHS 1996 | CCHS 1.1 | CCHS 1.2 | CCHS 2.1 | CCHS 3.1 | CCHS 2007/2008 | CCHS 2009/2010 | CCHS 2011/2012 | CCHS 2012MH | CCHS 2013 |
|-----------------------|-----------|----------|----------|----------|----------|----------------|----------------|----------------|-------------|-----------|
| British Columbia      | X         | X        | X        |          | X        |                | X              |                | X           |           |
| Alberta               | X         | X        | X        | X        | X        | X              | X              |                | X           |           |
| Saskatchewan          | X         | X        | X        | X        | X        |                | X              | X              | X           |           |
| Manitoba              | X         | X        | X        |          |          |                |                |                | X           | X         |
| Ontario               | X         | X        | X        | X        |          |                |                |                | X           |           |
| Quebec                | X         | X        | X        |          | X        | X              | X              |                | X           | X         |
| Nova Scotia           | X         | X        | X        |          | X        | X              |                | X              | X           | X         |
| New Brunswick         | X         | X        | X        | X        |          | X              |                | X              | X           |           |
| Prince Edward Island  | X         | X        | X        | X        | X        |                | X              | X              | X           | X         |
| Newfoundland/Labrador | X         | X        | X        | X        |          |                |                | X              | X           | X         |
|                       |           |          |          |          |          |                |                |                |             |           |

\* These surveys included the MDE module only as optional content.
